# Supplementary material for: Proteomic Analysis in Valvular Cardiomyopathy: Aortic Regurgitation vs. Aortic Stenosis
Source: MDPI journal article supplement (doi:10.3390/cells12060878), 2023-03-11
Supplement: s1 [file s1]

---

*Article*

# Proteomic Analysis in Valvular Cardiomyopathy: Aortic Regurgitation vs. Aortic Stenosis

Theresa Holst <sup>1,2,†,\*</sup>, Johannes Petersen <sup>2,3,†</sup>, Sabine Ameling <sup>4,5</sup>, Lisa Müller <sup>1</sup>, Torsten Christ <sup>3,6</sup>, Naomi Gedeon <sup>2,3,6</sup>, Thomas Eschenhagen <sup>3,6</sup>, Hermann Reichenspurner <sup>2,3</sup>, Elke Hammer <sup>4,5,†</sup> and Evaldas Girdauskas <sup>1,2,3,\*</sup>

<sup>1</sup> Department of Cardiothoracic Surgery, Augsburg University Hospital, Stenglinstraße 2, 86156 Augsburg, Germany

<sup>2</sup> Department of Cardiovascular Surgery, University Heart and Vascular Center Hamburg, Martinistraße 52, 20246 Hamburg, Germany

<sup>3</sup> German Center of Cardiovascular Research (DZHK), Partner Site Hamburg/Kiel/Lübeck, Germany

<sup>4</sup> Interfaculty Institute for Genetics and Functional Genomics, University Medicine Greifswald, Felix-Hausdorff-Straße 8, 17487 Greifswald, Germany

<sup>5</sup> German Center of Cardiovascular Research (DZHK), Partner Site Greifswald, Germany

<sup>6</sup> Institute of Experimental Pharmacology and Toxicology, University Medical Center Hamburg-Eppendorf, Martinistraße 52, 20246 Hamburg, Germany

\* Correspondence: [theresa.holst@uk-augsburg.de](mailto:theresa.holst@uk-augsburg.de) (T.H.); [evaldas.girdauskas@uk-augsburg.de](mailto:evaldas.girdauskas@uk-augsburg.de) (E.G.); Tel.: +49-821-400-2591; Fax: +49-821-172591

† These authors contributed equally to this work.

---

## 1. Supplementary Materials

### 1.1. Supplementary Figure

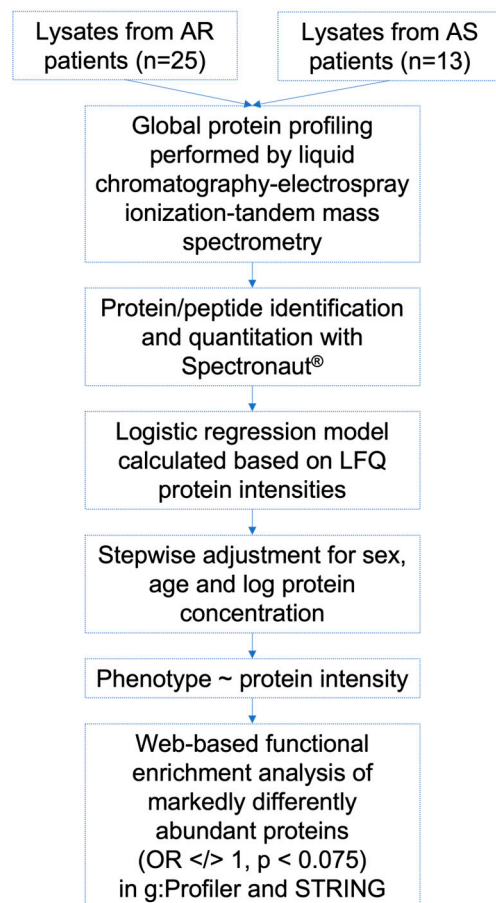

**Figure S1.** Flow chart for proteomic assessment of final sample set. AR: aortic regurgitation; AS: aortic stenosis; LFQ: label-free quantitation; OR: Odds ratio.

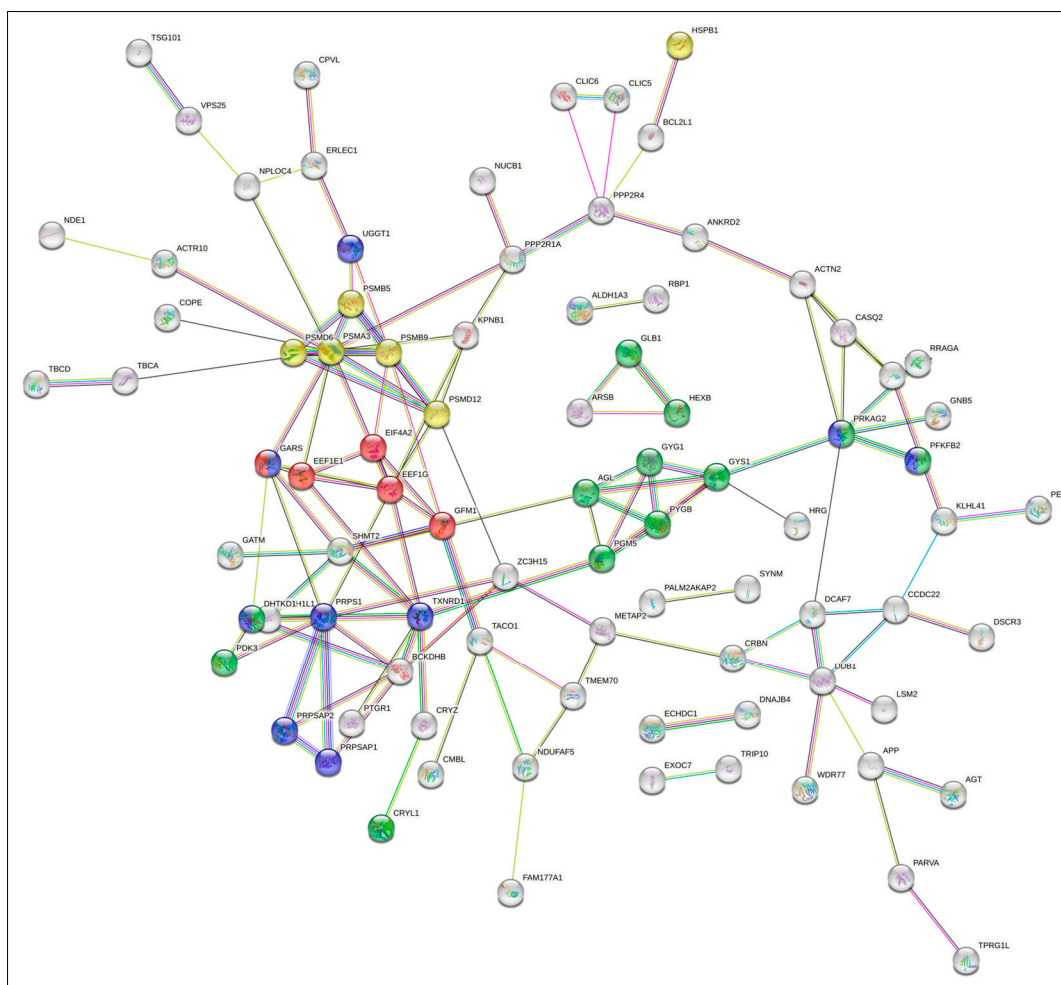

**Figure S2.** Network visualization of protein-protein interconnections of proteins being characteristic of the aortic regurgitation group using STRING: proteins assigned to carbohydrate metabolism (green), nucleotide metabolism (blue), protein biosynthesis (red), and the proteasome (yellow). Disconnected nodes in the network hidden.

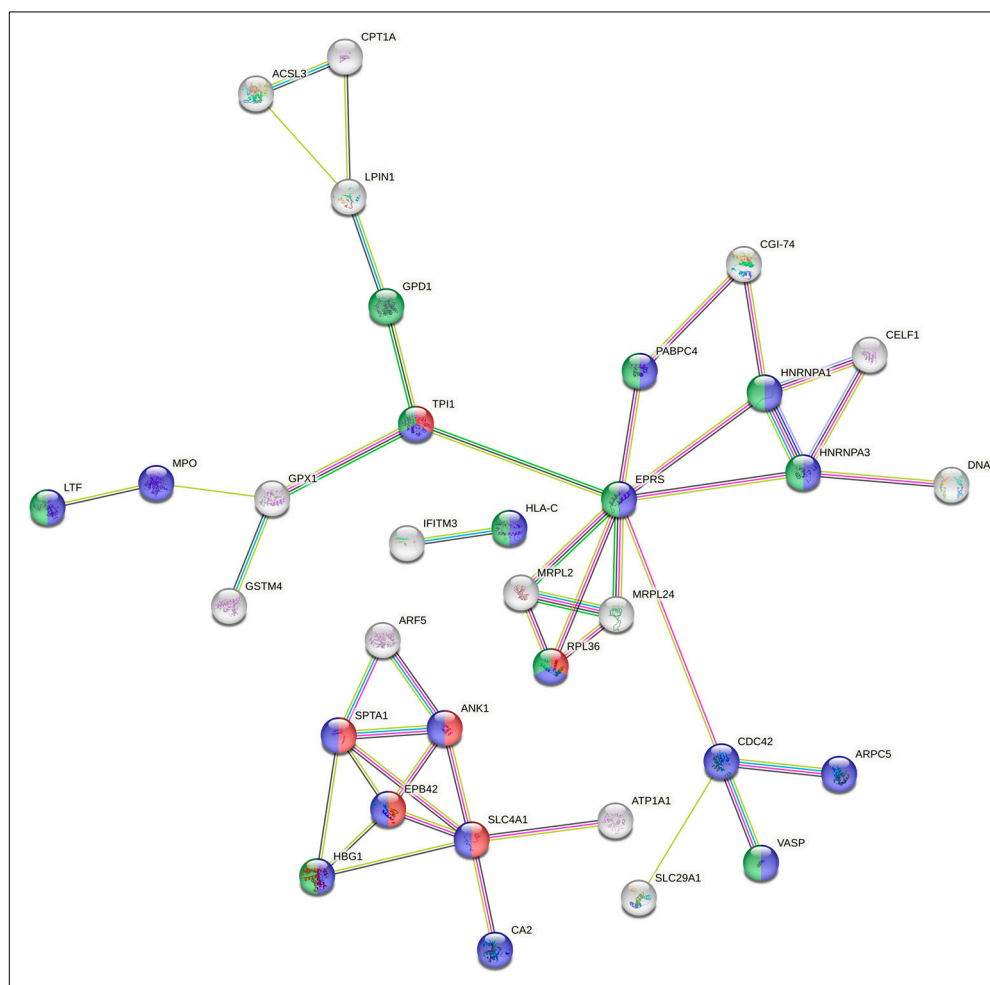

**Figure S3.** Network visualization of protein-protein interconnections of proteins being characteristic of the aortic stenosis using STRING: proteins assigned to the immune system (green) and hematopoietic system/angiogenesis (blue) and anemia (red) in specific. Disconnected nodes in the network hidden.

## 1.2. Supplementary Tables

**Table S1\_A.** Liquid chromatography-electrospray ionization-tandem mass spectrometry parameter (data independent mode; quantitative data).

| <b>Data independent analyses (DIA)</b>         |                                                                                                                                               |
|------------------------------------------------|-----------------------------------------------------------------------------------------------------------------------------------------------|
| <b>reversed phase liquid chromatography</b>    | <b>Ultimate 3000 RSLC (Thermo Scientific)</b>                                                                                                 |
| Trap column                                    | 75 µm inner diameter, packed with 3 µm C18 particles (Acclaim PepMap100, Thermo Scientific)                                                   |
| Analytical column                              | 75 µm inner diameter, packed with 2.6 µm C18 particles (Accucore, 25 cm, Thermo Scientific)                                                   |
| Flow rate                                      | 300 nl/min                                                                                                                                    |
| Column oven temperature                        | 40°C                                                                                                                                          |
| Buffer system                                  | Binary buffer system consisting of 0.1% acetic acid in HPLC-grade water (buffer A) and 100% ACN in 0.1% acetic acid (buffer B)                |
| Gradient                                       | Gradient of buffer B: 2min 2% to 5 %, 8min 5% to 7%, 60min 7% to 25%, 5min 25 to 40%, 2 min 40% to 90%, 6 min 90%, 2 min 90% to 2%, 10 min 2% |
| <b>Mass spectrometer</b>                       | <b>Exploris 480</b>                                                                                                                           |
| Operation mode                                 | Data-independent                                                                                                                              |
| Electrospray                                   | Nanospray Flex Ion Source                                                                                                                     |
| <b>Full MS</b>                                 |                                                                                                                                               |
| MS scan resolution                             | 120,000                                                                                                                                       |
| Normalized AGC target                          | 300 %                                                                                                                                         |
| Maximum ion injection time for the MS scan     | 60 ms                                                                                                                                         |
| Scan range                                     | 350 to 1200 <i>m/z</i>                                                                                                                        |
| Spectra data type                              | Profile                                                                                                                                       |
| <b>DIA scan</b>                                |                                                                                                                                               |
| Resolution                                     | 30,000                                                                                                                                        |
| Normalized AGC target                          | 3000                                                                                                                                          |
| Maximum ion injection time for the MS/MS scans | Auto                                                                                                                                          |
| Spectra data type                              | Profile                                                                                                                                       |
| Selection for MS/MS                            | 1                                                                                                                                             |
| Isolation window                               | 65 windows <i>m/z</i> 13 (overlap 2)                                                                                                          |
| Fixed first mass                               | 200                                                                                                                                           |
| Dissociation mode                              | Higher energy collisional dissociation (HCD)                                                                                                  |
| Normalized collision energy                    | Stepped, 30                                                                                                                                   |
| Dissociation mode                              | HCD                                                                                                                                           |

**Table S1\_B.** Spectronaut parameters for peptide/protein identification and intensity extraction.

| <b>Spectronaut</b>       |
|--------------------------|
| <b>16.0.220606.53000</b> |

|                                            |                                        |
|--------------------------------------------|----------------------------------------|
| Computer Name: AGVOE-SPECTRONAUT           |                                        |
| User Domain Name: AGVOE-SPECTRONAUT        |                                        |
| User Name: spectronaut                     |                                        |
| Analysis Mode: UI                          |                                        |
| Analysis Type: directDIA                   |                                        |
| Analysis Date: 05-August-2022              |                                        |
| Settings Used:                             |                                        |
| <b><u>Pulsar Search\Peptides</u></b>       |                                        |
| Toggle N-terminal M:                       | True                                   |
| Min Peptide Length:                        | 7                                      |
| Max Peptide Length:                        | 52                                     |
| Missed Cleavages:                          | 2                                      |
| Digest Type:                               | Specific                               |
| Enzymes / Cleavage Rules:                  | Trypsin/P                              |
| <b><u>Pulsar Search\Labeling</u></b>       |                                        |
| Channels:                                  |                                        |
| Channel 1:                                 | False                                  |
| Channel 2:                                 | False                                  |
| Channel 3:                                 | False                                  |
| <b><u>DIA Analysis\Data Extraction</u></b> |                                        |
| MS1 Mass Tolerance Strategy:               | Dynamic                                |
| Correction Factor:                         | 1                                      |
| MS2 Mass Tolerance Strategy:               | Dynamic                                |
| Correction Factor:                         | 1                                      |
| Intensity Extraction MS1:                  | Maximum Intensity                      |
| Intensity Extraction MS2:                  | Maximum Intensity                      |
| <b><u>DIA Analysis\XIC Extraction</u></b>  |                                        |
| XIC IM Extraction Window:                  | Dynamic                                |
| Correction Factor:                         | 1                                      |
| XIC RT Extraction Window:                  | Dynamic                                |
| Correction Factor:                         | 1                                      |
| <b><u>Pulsar Search\Modifications</u></b>  |                                        |
| Max Variable Modifications:                | 5                                      |
| <b><u>Database</u></b>                     |                                        |
| Original File:                             | uniprot_Human_2022_01.fasta            |
| <b><u>Select Modifications:</u></b>        |                                        |
| Fixed Modifications::                      | Carbamidomethyl (C)                    |
| Variable Modifications: :                  | Acetyl (Protein N-term), Oxidation (M) |
| <b><u>DIA Analysis\Calibration</u></b>     |                                        |
| MS1 Mass Tolerance Strategy:               | System Default                         |

|                                           |                                                           |
|-------------------------------------------|-----------------------------------------------------------|
| MS2 Mass Tolerance Strategy:              | System Default                                            |
| Precision iRT:                            | True                                                      |
| iRT <-> RT Regression Type:               | Local (Non-Linear) Regression                             |
| Exclude Deamidated Peptides:              | True                                                      |
| MZ Extraction Strategy:                   | Maximum Intensity                                         |
| Allow source specific iRT Calibration:    | True                                                      |
| <b><u>DIA Analysis\Identification</u></b> |                                                           |
| Generate Decoys:                          | True                                                      |
| Decoy Limit Strategy:                     | Dynamic                                                   |
| Library Size Fraction:                    | 0.1                                                       |
| Decoy Method:                             | Mutated                                                   |
| Preferred Fragment Source:                | NN Predicted Fragments                                    |
| Machine Learning:                         | Per Run                                                   |
| Exclude Duplicate Assays:                 | True                                                      |
| Precursor PEP Cutoff:                     | 0.2                                                       |
| Protein Qvalue Cutoff (Experiment):       | 0.01                                                      |
| Protein Qvalue Cutoff (Run):              | 0.05                                                      |
| Exclude Single Hit Proteins:              | False                                                     |
| Pvalue Estimator:                         | Kernel Density Estimator                                  |
| Precursor Qvalue Cutoff:                  | 0.001                                                     |
| Single Hit Definition:                    | By Stripped Sequence                                      |
| <b><u>DIA Analysis\Quantification</u></b> |                                                           |
| Interference Correction:                  | True                                                      |
| MS1 Min:                                  | 2                                                         |
| MS2 Min:                                  | 3                                                         |
| Exclude All Multi-Channel Interferences:  | True                                                      |
| Only Identified Peptides:                 | True                                                      |
| Protein LFQ Method:                       | Automatic                                                 |
| Major (Protein) Grouping:                 | by Protein Group Id                                       |
| Minor (Peptide) Grouping:                 | by Stripped Sequence                                      |
| Minor Group Top N:                        | False                                                     |
| Minor Group Quantity:                     | Sum precursor quantity                                    |
| Major Group Top N:                        | True                                                      |
| Min:                                      | 2                                                         |
| Max:                                      | 3                                                         |
| Major Group Quantity:                     | Mean peptide quantity                                     |
| Quantity MS-Level:                        | MS2                                                       |
| Quantity Type:                            | Area                                                      |
| Proteotypicity Filter:                    | None (set to proteotypic by in-house analysis R pipeline) |
| Data Filtering:                           | Identified in % of Runs (Percentile)                      |
| Fraction:                                 | 0.2                                                       |
| Imputing Strategy:                        | No Imputing                                               |
| Cross Run Normalization:                  | True (local)                                              |

**DIA Analysis\PTM Work-flow**

|                     |       |
|---------------------|-------|
| PTM Localization:   | True  |
| Probability Cutoff: | 0.75  |
| PTM Analysis:       | True  |
| Multiplicity:       | True  |
| Run Clustering:     | False |
| PTM Consolidation:  | Sum   |
| Flanking Region:    | 7     |

**DIA Analysis\Workflow**

|                                   |                                       |
|-----------------------------------|---------------------------------------|
| MS2 DeMultiplexing:               | Automatic                             |
| Run Limit for directDIA Library:  | -1                                    |
| Method Evaluation:                | False                                 |
| Profiling Strategy:               | iRT Profiling                         |
| Profiling Row Selection:          | Minimum Qvalue Row Selection          |
| Qvalue Threshold:                 | 0.001                                 |
| Profiling Target Selection:       | Profile only non-identified Precursor |
| Identification Criterion:         | Qvalue                                |
| Threshold:                        | 0.001                                 |
| Carry-over exact Peak Boundaries: | False                                 |
| Unify Peptide Peaks Strategy:     | Select corresponding Peak             |

**DIA Analysis\Protein Inference**

|                             |           |
|-----------------------------|-----------|
| Protein Inference Workflow: | Automatic |
| Inference Algorithm:        | IDPicker  |

**DIA Analysis\Post Analysis**

|                                      |                                         |
|--------------------------------------|-----------------------------------------|
| Calculate Sample Correlation Matrix: | True                                    |
| Calculate Explained TIC:             | Quick                                   |
| Differential Abundance Grouping:     | Major Group (Quantification Settings)   |
| Smallest Quantitative Unit:          | Precursor Ion (Quantification Settings) |
| Use All MS-Level Quantities:         | False                                   |
| Differential Abundance Testing:      | t-test                                  |
| Group-Wise Testing Correction:       | False                                   |
| Run Clustering:                      | True                                    |
| Distance Metric:                     | Manhattan Distance                      |
| Linkage Strategy:                    | Ward's Method                           |
| Z-score transformation:              | False                                   |
| Order Runs by Clustering:            | True                                    |

**DIA Analysis\Pipeline Mode**

|                        |      |
|------------------------|------|
| Post Analysis Reports: |      |
| Scoring Histograms:    | True |



|                                            |                            |
|--------------------------------------------|----------------------------|
| Data Completeness Bar Chart:               | True                       |
| Run Identifications Bar Chart:             | True                       |
| CV Density Line Chart:                     | True                       |
| CVs Below X Bar Chart:                     | True                       |
| Generate SNE File:                         | True                       |
| Store Iontraces in SNE:                    | False                      |
| Report Schema:                             | C_FunGene_complex (Normal) |
| Reporting Unit:                            | Across Experiment          |
| <b><u>Pulsar Search\Identification</u></b> |                            |
| Peptide FDR:                               | 0.01                       |
| Protein Group FDR:                         | 0.01                       |
| PSM FDR:                                   | 0.01                       |
| <b><u>Pulsar Search\Tolerances</u></b>     |                            |
| <b><u>Tolerance Parameters:</u></b>        |                            |
| Thermo Orbitrap:                           |                            |
| Calibration Search:                        | Dynamic                    |
| MS1 Correction Factor:                     | 1                          |
| MS2 Correction Factor:                     | 1                          |
| Main Search:                               | Dynamic                    |
| MS1 Correction Factor:                     | 1                          |
| MS2 Correction Factor:                     | 1                          |
| <b><u>TOF:</u></b>                         |                            |
| Calibration Search:                        | Dynamic                    |
| MS1 Correction Factor:                     | 1                          |
| MS2 Correction Factor:                     | 1                          |
| Main Search:                               | Dynamic                    |
| MS1 Correction Factor:                     | 1                          |
| MS2 Correction Factor:                     | 1                          |
| <b><u>Thermo IonTrap:</u></b>              |                            |
| Calibration Search:                        | Dynamic                    |
| MS1 Correction Factor:                     | 1                          |
| MS2 Correction Factor:                     | 1                          |
| Main Search:                               | Dynamic                    |
| MS1 Correction Factor:                     | 1                          |
| MS2 Correction Factor:                     | 1                          |
| <b><u>Pulsar Search\Workflow</u></b>       |                            |
| Use DNN Predicted Ion Mobility:            | Auto                       |
| Fragment Ion Selection Strategy:           | Intensity Based            |
| In-Silico Generate Missing Channels:       | False                      |
| <b><u>Pulsar Search\Result Filters</u></b> |                            |
| <b><u>Precursors:</u></b>                  |                            |
| Best N Fragments per Peptide:              | True                       |
| Min:                                       | 6                          |
| Max:                                       | 10                         |

---

|                                    |       |
|------------------------------------|-------|
| Channel Count:                     | False |
| Modifications:                     | None  |
| Amino Acids:                       | False |
| Best N Peptides per Protein Group: | False |
| FASTA Matched:                     | False |
| Missed Cleavage:                   | False |
| Peptide Charge:                    | False |
| Proteotypicity:                    | False |
| <u>Fragment Ions:</u>              |       |
| m/z :                              | True  |
| Min:                               | 300   |
| Max:                               | 1800  |
| Ion Charge:                        | False |
| Ion Loss Type:                     | False |
| Ion Type:                          | False |
| Ion AA Length:                     | True  |
| N:                                 | 3     |
| Relative Intensity:                | True  |
| Min:                               | 5     |

---

**Table S2.** Aortic regurgitation-associated proteins: OR > 1,  $p < 0.075$ . OR: Odds ratio, i.e. chance to be assigned to the aortic regurgitation group when protein intensity is high.

| Protein ID | Gene name     | Protein name*                                                                      | OR     | p-value | 95% CI<br>lower limit | 95% CI<br>upper limit |
|------------|---------------|------------------------------------------------------------------------------------|--------|---------|-----------------------|-----------------------|
| Q9UBV8     | PEF1          | Peflin                                                                             | 160.23 | 0.028   | 1.75                  | 14708.73              |
| Q9NVD7     | PARVA         | Alpha-parvin                                                                       | 63.56  | 0.052   | 0.97                  | 4180.91               |
| P46976     | GYG1          | Glycogenin-1                                                                       | 27.43  | 0.020   | 1.67                  | 449.35                |
| O60826     | CCDC22        | Coiled-coil domain-containing protein 22                                           | 26.31  | 0.032   | 1.32                  | 525.42                |
| O43324     | EEF1E1        | Eukaryotic translation elongation factor 1 epsilon-1                               | 25.35  | 0.019   | 1.71                  | 375.80                |
| P30153     | PPP2R1A       | Serine/threonine-protein phosphatase 2A 65 kDa regulatory subunit A alpha iso-form | 19.04  | 0.051   | 0.99                  | 365.84                |
| P25686     | DNAJB2        | DnaJ homolog subfamily B member 2                                                  | 17.56  | 0.043   | 1.10                  | 281.40                |
| Q14232     | EIF2B1        | Translation initiation factor eIF-2B subunit alpha                                 | 16.18  | 0.048   | 1.03                  | 255.29                |
| Q14558     | PRPSAP1       | Phosphoribosyl pyrophosphate synthase-associated protein 1,                        | 15.50  | 0.017   | 1.64                  | 146.19                |
| O15061     | SYNM          | Synemin                                                                            | 14.64  | 0.021   | 1.51                  | 142.18                |
| Q15124     | PGM5          | Phosphoglucomutase-like protein 5                                                  | 13.00  | 0.021   | 1.46                  | 115.44                |
| Q9NZ32     | ACTR10        | Actin-related protein 10                                                           | 12.82  | 0.012   | 1.77                  | 93.02                 |
| Q96IZ0     | PAWR          | PRKC apoptosis WT1 regulator protein                                               | 9.07   | 0.025   | 1.32                  | 62.46                 |
| O60825     | PFKFB2        | 6-phosphofructo-2-kinase/fructose-2,6-bisphosphatase 2                             | 8.62   | 0.018   | 1.45                  | 51.42                 |
| P35573     | AGL           | Glycogen debranching enzyme                                                        | 8.45   | 0.026   | 1.28                  | 55.62                 |
| P04196     | HRG           | Histidine-rich glycoprotein                                                        | 8.26   | 0.031   | 1.22                  | 56.02                 |
| Q5T0D9     | TPRG1L        | Tumor protein p63-regulated gene 1-like protein                                    | 8.20   | 0.050   | 1.00                  | 67.16                 |
| Q16881     | TXNRD1        | Thioredoxin reductase 1, cytoplasmic                                               | 7.54   | 0.054   | 0.96                  | 59.04                 |
| O75891     | ALDH1L1       | Cytosolic 10-formyltetrahydrofolate dehydrogenase                                  | 7.53   | 0.024   | 1.30                  | 43.66                 |
| Q99766     | ATP5S/DMA C2L | ATP synthase subunit s, mitochondrial                                              | 7.47   | 0.049   | 1.01                  | 55.14                 |

|        |         |                                                                 |      |       |      |       |
|--------|---------|-----------------------------------------------------------------|------|-------|------|-------|
| P26641 | EEF1G   | Elongation factor 1-gamma                                       | 7.44 | 0.027 | 1.26 | 44.00 |
| Q7Z4V5 | HDGFL2  | Hepatoma-derived growth factor-related protein 2                | 7.33 | 0.015 | 1.47 | 36.56 |
| P60891 | PRPS1   | Ribose-phosphate pyrophosphokinase 1                            | 7.08 | 0.021 | 1.35 | 37.11 |
| Q14956 | GPNMB   | Transmembrane glycoprotein NMB                                  | 6.86 | 0.011 | 1.56 | 30.25 |
| P04792 | HSPB1   | Heat shock protein beta-1, HspB1                                | 6.65 | 0.055 | 0.96 | 45.91 |
| O60256 | PRPSAP2 | Phosphoribosyl pyrophosphate synthase-associated protein 2      | 6.63 | 0.017 | 1.40 | 31.39 |
| P09455 | RBP1    | Retinol-binding protein 1                                       | 6.58 | 0.030 | 1.20 | 36.21 |
| P55809 | OXCT1   | Succinyl-CoA:3-ketoacid coenzyme A transferase 1, mitochondrial | 6.45 | 0.053 | 0.97 | 42.75 |
| Q07817 | BCL2L1  | Bcl-2-like protein 1                                            | 6.43 | 0.024 | 1.27 | 32.48 |
| Q02818 | NUCB1   | Nucleobindin-1                                                  | 6.27 | 0.074 | 0.84 | 47.05 |
| P11216 | PYGB    | Glycogen phosphorylase, brain form                              | 6.26 | 0.038 | 1.11 | 35.33 |
| Q96DZ1 | ERLEC1  | Endoplasmic reticulum lectin 1                                  | 6.15 | 0.074 | 0.84 | 45.01 |
| P01019 | AGT     | Angiotensinogen                                                 | 5.90 | 0.028 | 1.21 | 28.72 |
| Q15120 | PDK3    | [Pyruvate dehydrogenase (acetyl-transferring)] kinase isozyme 3 | 5.73 | 0.041 | 1.07 | 30.66 |
| P28074 | PSMB5   | Proteasome subunit beta type-5                                  | 5.47 | 0.044 | 1.05 | 28.54 |
| Q16531 | DDB1    | DNA damage-binding protein 1                                    | 5.22 | 0.054 | 0.97 | 28.02 |
| P35609 | ACTN2   | Alpha-actinin-2                                                 | 5.22 | 0.048 | 1.01 | 26.89 |
| Q9NYL2 | MAP3K20 | Mitogen-activated protein kinase kinase kinase 20               | 5.21 | 0.060 | 0.94 | 29.03 |
| Q9Y316 | MEMO1   | Protein MEMO1                                                   | 5.11 | 0.019 | 1.30 | 20.05 |
| Q9NVT9 | ARMC1   | Armadillo repeat-containing protein 1                           | 5.02 | 0.025 | 1.22 | 20.59 |
| Q6VY07 | PACS1   | Phosphofurin acidic cluster sorting protein 1                   | 4.97 | 0.029 | 1.18 | 20.91 |
| Q9NYU2 | UGGT1   | UDP-glucose:glycoprotein glucosyltransferase 1                  | 4.88 | 0.069 | 0.89 | 26.93 |
| P61962 | DCAF7   | DDB1- and CUL4-associated factor 7                              | 4.86 | 0.044 | 1.04 | 22.74 |
| P28065 | PSMB9   | Proteasome subunit beta type-9                                  | 4.67 | 0.072 | 0.87 | 25.03 |
| Q96HY7 | DHTKD1  | 2-oxoadipate dehydrogenase complex component E1                 | 4.58 | 0.045 | 1.04 | 20.21 |

|        |          |                                                                                 |      |       |      |       |
|--------|----------|---------------------------------------------------------------------------------|------|-------|------|-------|
| Q9NXR1 | NDE1     | Nuclear distribution protein nudE homo-<br>log 1                                | 4.51 | 0.051 | 0.99 | 20.51 |
| Q8N8S7 | ENAH     | Protein enabled homolog                                                         | 4.51 | 0.023 | 1.24 | 16.45 |
| P05067 | APP      | Amyloid-beta precursor protein                                                  | 4.48 | 0.059 | 0.94 | 21.35 |
| P15848 | ARSB     | Arylsulfatase B                                                                 | 4.47 | 0.030 | 1.15 | 17.37 |
| Q9BRG1 | VPS25    | Vacuolar protein-sorting-associated pro-<br>tein 25                             | 4.46 | 0.046 | 1.02 | 19.45 |
| Q08257 | CRYZ     | Quinone oxidoreductase                                                          | 4.45 | 0.023 | 1.23 | 16.04 |
| Q16658 | FSCN1    | Fascin                                                                          | 4.45 | 0.038 | 1.09 | 18.21 |
| Q9H3G5 | CPVL     | Probable serine carboxypeptidase CPVL                                           | 4.44 | 0.033 | 1.12 | 17.54 |
| Q9HAB8 | PPCS     | Phosphopantothenate--cysteine ligase,<br>Phosphopantothenoylcysteine synthetase | 4.44 | 0.039 | 1.07 | 18.35 |
| P16278 | GLB1     | Beta-galactosidase                                                              | 4.43 | 0.044 | 1.04 | 18.85 |
| Q9BYV6 | TRIM55   | Tripartite motif-containing protein 55                                          | 4.40 | 0.053 | 0.98 | 19.76 |
| O14958 | CASQ2    | Calsequestrin-2                                                                 | 4.37 | 0.062 | 0.93 | 20.66 |
| Q9UPT5 | EXOC7    | Exocyst complex component 7                                                     | 4.31 | 0.063 | 0.92 | 20.09 |
| Q99816 | TSG101   | Tumor susceptibility gene 101 protein                                           | 4.30 | 0.064 | 0.92 | 20.13 |
| O60662 | KLHL41   | Kelch-like protein 41                                                           | 4.28 | 0.040 | 1.07 | 17.21 |
| Q7L523 | RRAGA    | Ras-related GTP-binding protein A                                               | 4.28 | 0.030 | 1.15 | 15.89 |
| P78385 | KRT83    | Keratin, type II cuticular Hb3                                                  | 4.28 | 0.051 | 0.99 | 18.39 |
| Q14974 | KPNB1    | Importin subunit beta-1                                                         | 4.21 | 0.067 | 0.90 | 19.64 |
| P08185 | SERPINA6 | Corticosteroid-binding globulin                                                 | 4.17 | 0.061 | 0.94 | 18.50 |
| Q15642 | TRIP10   | Cdc42-interacting protein 4                                                     | 4.14 | 0.072 | 0.88 | 19.49 |
| Q5TEU4 | NDUFAF5  | Arginine-hydroxylase NDUFAF5, mito-<br>chondrial                                | 4.12 | 0.054 | 0.97 | 17.46 |
| Q9Y2D5 | AKAP2    | A-kinase anchor protein 2                                                       | 4.08 | 0.065 | 0.92 | 18.18 |
| Q9NRK6 | ABCB10   | ATP-binding cassette sub-family B mem-<br>ber 10, mitochondrial                 | 4.06 | 0.061 | 0.94 | 17.61 |
| P50579 | METAP2   | Methionine aminopeptidase 2                                                     | 4.00 | 0.074 | 0.87 | 18.30 |
| P07686 | HEXB     | Beta-hexosaminidase subunit beta                                                | 3.94 | 0.052 | 0.99 | 15.72 |
| O00232 | PSMD12   | 26S proteasome non-ATPase regulatory<br>subunit 12                              | 3.89 | 0.040 | 1.06 | 14.28 |
| P05452 | CLEC3B   | Tetranectin                                                                     | 3.86 | 0.042 | 1.05 | 14.15 |
| Q9NZA1 | CLIC5    | Chloride intracellular channel protein 5                                        | 3.85 | 0.068 | 0.90 | 16.43 |

|        |         |                                                        |      |       |      |       |
|--------|---------|--------------------------------------------------------|------|-------|------|-------|
| O75347 | TBCA    | Tubulin-specific chaperone A                           | 3.84 | 0.041 | 1.06 | 13.95 |
| Q9Y2S2 | CRYL1   | Lambda-crystallin homolog                              | 3.78 | 0.046 | 1.03 | 13.94 |
| O14972 | VPS26C  | Vacuolar protein sorting-associated protein 26C        | 3.78 | 0.068 | 0.91 | 15.76 |
| P25788 | PSMA3   | Proteasome subunit alpha type-3 (Macropain subunit C8) | 3.68 | 0.058 | 0.96 | 14.17 |
| Q9BSH4 | TACO1   | Translational activator of cytochrome c oxidase 1      | 3.66 | 0.071 | 0.90 | 14.95 |
| Q9UGJ0 | PRKAG2  | 5'-AMP-activated protein kinase subunit gamma-2        | 3.60 | 0.057 | 0.96 | 13.46 |
| Q9NTX5 | ECHDC1  | Ethylmalonyl-CoA decarboxylase                         | 3.60 | 0.053 | 0.99 | 13.12 |
| Q9Y333 | LSM2    | U6 snRNA-associated Sm-like protein LSm2               | 3.58 | 0.053 | 0.99 | 13.03 |
| P35659 | DEK     | Protein DEK                                            | 3.50 | 0.069 | 0.91 | 13.50 |
| Q96NY7 | CLIC6   | Chloride intracellular channel protein 6               | 3.49 | 0.049 | 1.01 | 12.11 |
| Q9BTW9 | TBCD    | Tubulin-specific chaperone D                           | 3.48 | 0.029 | 1.14 | 10.65 |
| Q9BUB7 | TMEM70  | Transmembrane protein 70                               | 3.47 | 0.067 | 0.91 | 13.19 |
| Q92599 | SEPTIN8 | Septin-8                                               | 3.47 | 0.036 | 1.08 | 11.10 |
| Q14914 | PTGR1   | Prostaglandin reductase 1                              | 3.45 | 0.036 | 1.09 | 10.97 |
| Q3ZCW2 | LGALSL  | Galectin-related protein                               | 3.42 | 0.040 | 1.06 | 11.04 |
| Q96DG6 | CMBL    | Carboxymethylenebutenolidase homolog                   | 3.41 | 0.039 | 1.06 | 10.96 |
| Q8WU90 | ZC3H15  | Zinc finger CCCH domain-containing protein 15          | 3.41 | 0.036 | 1.08 | 10.74 |
| Q9BQA1 | WDR77   | Methylosome protein 50                                 | 3.31 | 0.048 | 1.01 | 10.85 |
| P41250 | GARS1   | Glycine--tRNA ligase                                   | 3.27 | 0.052 | 0.99 | 10.79 |
| Q14240 | EIF4A2  | Eukaryotic initiation factor 4A-II                     | 3.22 | 0.051 | 1.00 | 10.44 |
| Q96RP9 | GFM1    | Elongation factor G, mitochondrial                     | 3.11 | 0.066 | 0.93 | 10.42 |
| Q9GZV1 | ANKRD2  | Ankyrin repeat domain-containing protein 2             | 3.09 | 0.054 | 0.98 | 9.72  |
| Q15008 | PSMD6   | 26S proteasome non-ATPase regulatory subunit 6         | 3.08 | 0.072 | 0.91 | 10.45 |
| Q8WZA9 | IRGQ    | Immunity-related GTPase family Q protein               | 3.07 | 0.073 | 0.90 | 10.43 |
| Q86TI2 | DPP9    | Dipeptidyl peptidase 9                                 | 3.04 | 0.054 | 0.98 | 9.45  |

|        |          |                                                                  |      |       |      |      |
|--------|----------|------------------------------------------------------------------|------|-------|------|------|
| Q9NPH2 | ISYNA1   | Inositol-3-phosphate synthase 1                                  | 3.01 | 0.052 | 0.99 | 9.17 |
| P50440 | GATM     | Glycine amidinotransferase, mitochondrial                        | 2.96 | 0.071 | 0.91 | 9.62 |
| O14775 | GNB5     | Guanine nucleotide-binding protein subunit beta-5                | 2.96 | 0.069 | 0.92 | 9.53 |
| P47895 | ALDH1A3  | Aldehyde dehydrogenase family 1 member A3                        | 2.95 | 0.056 | 0.97 | 8.94 |
| Q8N128 | FAM177A1 | Protein FAM177A1                                                 | 2.91 | 0.068 | 0.92 | 9.18 |
| Q9UHI8 | ADAMTS1  | A disintegrin and metalloproteinase with thrombospondin motifs 1 | 2.90 | 0.057 | 0.97 | 8.69 |
| Q63HQ2 | EGFLAM   | Pikachurin                                                       | 2.89 | 0.063 | 0.95 | 8.83 |
| P21953 | BCKDHB   | 2-oxoisovalerate dehydrogenase subunit beta, mitochondrial       | 2.88 | 0.054 | 0.98 | 8.47 |
| P46926 | GNPDA1   | Glucosamine-6-phosphate isomerase 1                              | 2.88 | 0.067 | 0.93 | 8.97 |
| Q9UDY4 | DNAJB4   | DnaJ homolog subfamily B member 4                                | 2.86 | 0.050 | 1.00 | 8.18 |
| Q15257 | PTPA     | Serine/threonine-protein phosphatase 2A activator                | 2.86 | 0.067 | 0.93 | 8.79 |
| P14324 | FDPS     | Farnesyl pyrophosphate synthase                                  | 2.85 | 0.048 | 1.01 | 8.07 |
| P34897 | SHMT2    | Serine hydroxymethyltransferase, mitochondrial                   | 2.81 | 0.075 | 0.90 | 8.75 |
| Q8TAT6 | NPLOC4   | Nuclear protein localization protein 4 homolog                   | 2.78 | 0.064 | 0.94 | 8.20 |
| Q96SW2 | CRBN     | Protein cereblon                                                 | 2.74 | 0.048 | 1.01 | 7.45 |
| Q9P2T1 | GMPR2    | GMP reductase 2                                                  | 2.70 | 0.075 | 0.91 | 8.08 |
| Q6P5Q4 | LMOD2    | Leiomodin-2                                                      | 2.65 | 0.049 | 1.00 | 7.02 |
| P13807 | GYS1     | Glycogen [starch] synthase, muscle                               | 2.49 | 0.059 | 0.97 | 6.43 |
| O14579 | COPE     | Coatomer subunit epsilon                                         | 2.48 | 0.065 | 0.94 | 6.53 |

\* Color-coding corresponding to color-coding used in Supplementary Figure S2: proteins assigned to carbohydrate metabolism (green), nucleotide metabolism (blue), protein biosynthesis (red), and the proteasome (yellow). *p*-values and Odds ratios were calculated by the *glm* function, confident intervals (95%) by the *confint.default* function of the *stats* package in R using LFQ protein intensities.

**Table S3.** Aortic stenosis-associated proteins: OR < 1, *p* < 0.075. OR: Odds ratio, i.e. chance to be assigned to the aortic stenosis group when protein intensity is high.

| Protein ID | Gene name | Protein name*                                              | OR   | p-value | 95% CI<br>lower limit | 95% CI<br>upper limit |
|------------|-----------|------------------------------------------------------------|------|---------|-----------------------|-----------------------|
| Q8NFW8     | CMA5      | N-acylneuraminate cytidyltransferase                       | 0.01 | 0.024   | 0.00                  | 0.50                  |
| Q687X5     | STEAP4    | Metalloreductase STEAP4                                    | 0.01 | 0.032   | 0.00                  | 0.66                  |
| Q709C8     | VPS13C    | Intermembrane lipid transfer protein<br>VPS13C             | 0.01 | 0.031   | 0.00                  | 0.67                  |
| Q32MK0     | MYLK3     | Myosin light chain kinase 3                                | 0.06 | 0.028   | 0.00                  | 0.74                  |
| O95573     | ACSL3     | Fatty acid CoA ligase Acsl3                                | 0.06 | 0.047   | 0.00                  | 0.96                  |
| O15511     | ARPC5     | Actin-related protein 2/3 complex subunit 5                | 0.07 | 0.019   | 0.01                  | 0.65                  |
| Q9Y383     | LUC7L2    | Putative RNA-binding protein Luc7-like 2                   | 0.10 | 0.042   | 0.01                  | 0.92                  |
| P02549     | SPTA1     | Spectrin alpha chain, erythrocytic 1                       | 0.10 | 0.021   | 0.01                  | 0.71                  |
| P60174     | TPI1      | Triosephosphate isomerase                                  | 0.10 | 0.043   | 0.01                  | 0.93                  |
| Q03013     | GSTM4     | Glutathione S-transferase Mu 4                             | 0.11 | 0.054   | 0.01                  | 1.04                  |
| P10321     | HLA-C     | HLA class I histocompatibility antigen, C alpha chain      | 0.11 | 0.033   | 0.01                  | 0.84                  |
| Q4KMQ2     | ANO6      | Anoctamin-6                                                | 0.11 | 0.031   | 0.02                  | 0.82                  |
| P00918     | CA2       | Carbonic anhydrase 2                                       | 0.11 | 0.024   | 0.02                  | 0.75                  |
| Q92879     | CELF1     | CUGBP Elav-like family member 1                            | 0.13 | 0.071   | 0.01                  | 1.19                  |
| Q5T653     | MRPL2     | 39S ribosomal protein L2, mitochondrial, L2mt, MRP-L2      | 0.15 | 0.059   | 0.02                  | 1.07                  |
| P07814     | EPRS1     | Bifunctional glutamate/proline--tRNA ligase                | 0.16 | 0.068   | 0.02                  | 1.14                  |
| P46937     | YAP1      | Transcriptional coactivator YAP1, Yes-associated protein 1 | 0.16 | 0.034   | 0.03                  | 0.87                  |
| Q14693     | LPIN1     | Phosphatidate phosphatase LPIN1                            | 0.18 | 0.048   | 0.03                  | 0.99                  |
| Q8NE62     | CHDH      | Choline dehydrogenase, mitochondrial                       | 0.19 | 0.056   | 0.04                  | 1.04                  |
| P51991     | HNRNPA3   | Heterogeneous nuclear ribonucleoprotein A3                 | 0.20 | 0.042   | 0.04                  | 0.94                  |
| P09651     | HNRNPA1   | Heterogeneous nuclear ribonucleoprotein A1, hnRNP A1       | 0.20 | 0.053   | 0.04                  | 1.02                  |
| Q9UBV2     | SEL1L     | Protein sel-1 homolog 1                                    | 0.21 | 0.042   | 0.05                  | 0.95                  |
| P07203     | GPX1      | Glutathione peroxidase 1                                   | 0.22 | 0.044   | 0.05                  | 0.96                  |



|               |         |                                                          |      |       |      |      |
|---------------|---------|----------------------------------------------------------|------|-------|------|------|
| Q96A35        | MRPL24  | 39S ribosomal protein L24, mitochondrial                 | 0.22 | 0.035 | 0.05 | 0.90 |
| P16452        | EPB42   | Protein 4.2                                              | 0.22 | 0.032 | 0.06 | 0.88 |
| Q9Y6C2        | EMILIN1 | EMILIN-1                                                 | 0.22 | 0.035 | 0.06 | 0.90 |
| P00414        | MT-CO3  | Cytochrome c oxidase subunit 3                           | 0.23 | 0.042 | 0.05 | 0.95 |
| Q8N163        | CCAR2   | Cell cycle and apoptosis regulator protein 2             | 0.23 | 0.065 | 0.05 | 1.09 |
| P60953        | CDC42   | Cell division control protein 42 homolog                 | 0.24 | 0.042 | 0.06 | 0.95 |
| P05164        | MPO     | Myeloperoxidase                                          | 0.24 | 0.027 | 0.07 | 0.85 |
| Q01628        | IFITM3  | Interferon-induced transmembrane protein 3               | 0.24 | 0.054 | 0.06 | 1.02 |
| Q99808        | SLC29A1 | Equilibrative nucleoside transporter 1                   | 0.24 | 0.061 | 0.06 | 1.06 |
| P54578        | USP14   | Ubiquitin carboxyl-terminal hydrolase 14                 | 0.25 | 0.039 | 0.06 | 0.93 |
| Q9BQJ4        | TMEM47  | Transmembrane protein 47                                 | 0.25 | 0.028 | 0.07 | 0.86 |
| Q13310        | PABPC4  | Polyadenylate-binding protein 4                          | 0.25 | 0.031 | 0.07 | 0.88 |
| P05023        | ATP1A1  | Sodium/potassium-transporting ATPase subunit alpha-1     | 0.26 | 0.047 | 0.07 | 0.98 |
| P02788        | LTF     | Lactotransferrin                                         | 0.27 | 0.023 | 0.09 | 0.83 |
| P21695        | GPD1    | Glycerol-3-phosphate dehydrogenase                       | 0.28 | 0.070 | 0.07 | 1.11 |
| Q9ULP0        | NDRG4   | Protein NDRG4                                            | 0.28 | 0.075 | 0.07 | 1.13 |
| Q9Y3U8        | RPL36   | 60S ribosomal protein L36                                | 0.29 | 0.049 | 0.08 | 1.00 |
| O60884        | DNAJA2  | DnaJ homolog subfamily A member 2                        | 0.29 | 0.053 | 0.08 | 1.02 |
| P42229_P51692 | STAT5A  | Signal transducer and activator of transcription 5A      | 0.30 | 0.047 | 0.09 | 0.98 |
| Q14766        | LTBP1   | Latent-transforming growth factor beta-binding protein 1 | 0.30 | 0.049 | 0.09 | 1.00 |
| P50552        | VASP    | Vasodilator-stimulated phosphoprotein                    | 0.30 | 0.050 | 0.09 | 1.00 |
| Q92629        | SGCD    | Delta-sarcoglycan                                        | 0.31 | 0.066 | 0.09 | 1.08 |
| P50416        | CPT1A   | Carnitine O-palmitoyltransferase 1, liver isoform        | 0.31 | 0.041 | 0.10 | 0.95 |
| P84085        | ARF5    | ADP-ribosylation factor 5                                | 0.31 | 0.056 | 0.09 | 1.03 |
| Q9NZ45        | CISD1   | CDGSH iron-sulfur domain-containing protein 1            | 0.32 | 0.053 | 0.10 | 1.02 |
| Q8NBX0        | SCCPDH  | Saccharopine dehydrogenase-like oxidoreductase           | 0.33 | 0.059 | 0.11 | 1.04 |

|        |        |                                |      |       |      |      |
|--------|--------|--------------------------------|------|-------|------|------|
| P16157 | ANK1   | Ankyrin-1                      | 0.34 | 0.046 | 0.12 | 0.98 |
| P09382 | LGALS1 | Galectin-1                     | 0.35 | 0.057 | 0.12 | 1.03 |
| P20336 | RAB3A  | Ras-related protein Rab-3A     | 0.38 | 0.055 | 0.14 | 1.02 |
| P02730 | SLC4A1 | Band 3 anion transport protein | 0.39 | 0.075 | 0.14 | 1.10 |
| P69891 | HBG1   | Hemoglobin subunit gamma-1     | 0.39 | 0.066 | 0.15 | 1.06 |

\* Color-coding corresponding to color-coding used in Supplementary Figure S3: proteins assigned to the immune system (green) and hematopoietic system/angiogenesis (blue) and anemia (red) in specific. *p*-values and Odds ratios were calculated by the *glm* function, confident intervals (95%) by the *confint.default* function of the *stats* package in R using LFQ protein intensities.

**Table S4.** Results of g:Profiler enrichment analysis of proteins with  $p < 0.075$  in the logistic regression analysis. Categories with adjusted  $p$ -value  $< 0.05$  (calculated by the g:SCS approach in g:Profiler) in either one or both analyses of proteins with Odds ratio  $> 1$  or Odds ratio  $< 1$  shown.

|           |                                                        | term_id    | term_size<br>(no of<br>mole-<br>cules in<br>category) | - proteins         |                            |                      |                          | - proteins         |                            |                      |                          |
|-----------|--------------------------------------------------------|------------|-------------------------------------------------------|--------------------|----------------------------|----------------------|--------------------------|--------------------|----------------------------|----------------------|--------------------------|
| term_name |                                                        |            |                                                       | adj pValue<br>(AR) | log10adj<br>pValue<br>(AR) | list<br>size<br>(AR) | with<br>OR $> 1$<br>(AR) | adj pValue<br>(AS) | log10adj<br>pValue<br>(AS) | list<br>size<br>(AS) | with<br>OR $< 1$<br>(AS) |
| GO:BP     | organonitrogen compound metabolic process              | GO:1901564 | 6522                                                  | 9.9E-05            | 4.00                       | 114                  | 63                       |                    |                            |                      |                          |
| GO:BP     | small molecule metabolic process                       | GO:0044281 | 1837                                                  | 1.7E-04            | 3.77                       | 114                  | 29                       |                    |                            |                      |                          |
| GO:BP     | catabolic process                                      | GO:0009056 | 2587                                                  | 2.5E-04            | 3.60                       | 114                  | 35                       |                    |                            |                      |                          |
| GO:BP     | cellular catabolic process                             | GO:0044248 | 2121                                                  | 1.0E-03            | 2.98                       | 114                  | 30                       |                    |                            |                      |                          |
| GO:BP     | nucleobase-containing small molecule metabolic process | GO:0055086 | 674                                                   | 1.2E-03            | 2.92                       | 114                  | 16                       |                    |                            |                      |                          |
| GO:BP     | carbohydrate metabolic process                         | GO:0005975 | 594                                                   | 1.3E-03            | 2.89                       | 114                  | 15                       |                    |                            |                      |                          |
| GO:BP     | carbohydrate catabolic process                         | GO:0016052 | 154                                                   | 3.3E-03            | 2.48                       | 114                  | 8                        |                    |                            |                      |                          |
| GO:BP     | organic substance catabolic process                    | GO:1901575 | 2128                                                  | 3.6E-03            | 2.44                       | 114                  | 29                       |                    |                            |                      |                          |
| GO:BP     | 5-phosphoribose 1-diphosphate biosynthetic process     | GO:0006015 | 6                                                     | 5.2E-03            | 2.28                       | 114                  | 3                        |                    |                            |                      |                          |
| GO:BP     | 5-phosphoribose 1-diphosphate metabolic process        | GO:0046391 | 6                                                     | 5.2E-03            | 2.28                       | 114                  | 3                        |                    |                            |                      |                          |
| GO:BP     | generation of precursor metabolites and energy         | GO:0006091 | 505                                                   | 6.0E-03            | 2.22                       | 114                  | 13                       |                    |                            |                      |                          |
| GO:BP     | cellular carbohydrate metabolic process                | GO:0044262 | 291                                                   | 7.1E-03            | 2.15                       | 114                  | 10                       |                    |                            |                      |                          |

|       |                                                 |            |       |         |       |     |     |         |      |    |    |
|-------|-------------------------------------------------|------------|-------|---------|-------|-----|-----|---------|------|----|----|
| GO:BP | negative regulation of molecular function       | GO:0044092 | 1111  | 1.3E-02 | 1.88  | 114 | 19  |         |      |    |    |
| GO:BP | purine-containing compound biosynthetic process | GO:0072522 | 251   | 1.6E-02 | 1.81  | 114 | 9   |         |      |    |    |
| GO:BP | cellular macromolecule metabolic process        | GO:0044260 | 3234  | 1.7E-02 | 1.76  | 114 | 36  |         |      |    |    |
| GO:BP | purine-containing compound metabolic process    | GO:0072521 | 506   | 3.3E-02 | 1.48  | 114 | 12  |         |      |    |    |
| GO:BP | nucleotide metabolic process                    | GO:0009117 | 597   | 3.6E-02 | 1.44  | 114 | 13  |         |      |    |    |
| GO:BP | proteolysis                                     | GO:0006508 | 1783  | 4.1E-02 | 1.38  | 114 | 24  |         |      |    |    |
| GO:BP | nucleoside phosphate metabolic process          | GO:0006753 | 607   | 4.3E-02 | 1.37  | 114 | 13  |         |      |    |    |
| GO:BP | organic acid metabolic process                  | GO:0006082 | 958   |         |       |     |     | 8.8E-03 | 2.06 | 54 | 12 |
| GO:BP | response to stress                              | GO:0006950 | 3938  |         |       |     |     | 2.5E-02 | 1.60 | 54 | 24 |
| GO:BP | response to chemical                            | GO:0042221 | 4383  |         |       |     |     | 4.9E-02 | 1.31 | 54 | 25 |
| GO:BP | oxoacid metabolic process                       | GO:0043436 | 951   |         |       |     |     | 5.0E-02 | 1.30 | 54 | 11 |
| GO:BP | regulation of biological quality                | GO:0065008 | 3726  |         |       |     |     | 9.5E-03 | 2.02 | 54 | 24 |
| GO:BP | cellular response to chemical stimulus          | GO:0070887 | 3049  |         |       |     |     | 1.9E-02 | 1.73 | 54 | 21 |
| GO:CC | cytoplasm                                       | GO:0005737 | 12270 | 6.6E-19 | 18.18 | 114 | 109 | 6.5E-05 | 4.19 | 54 | 48 |
| GO:CC | cytosol                                         | GO:0005829 | 5419  | 5.3E-12 | 11.28 | 114 | 67  |         |      |    |    |
| GO:CC | extracellular exosome                           | GO:0070062 | 2108  | 9.0E-12 | 11.05 | 114 | 41  | 1.6E-05 | 4.80 | 54 | 20 |
| GO:CC | extracellular vesicle                           | GO:1903561 | 2132  | 1.3E-11 | 10.88 | 114 | 41  | 3.3E-06 | 5.48 | 54 | 21 |
| GO:CC | extracellular organelle                         | GO:0043230 | 2133  | 1.3E-11 | 10.87 | 114 | 41  | 3.3E-06 | 5.48 | 54 | 21 |
| GO:CC | extracellular membrane-bounded organelle        | GO:0065010 | 2133  | 1.3E-11 | 10.87 | 114 | 41  | 3.3E-06 | 5.48 | 54 | 21 |
| GO:CC | vesicle                                         | GO:0031982 | 3973  | 1.5E-09 | 8.82  | 114 | 53  | 7.6E-03 | 2.12 | 54 | 23 |
| GO:CC | secretory granule lumen                         | GO:0034774 | 320   | 4.4E-07 | 6.36  | 114 | 14  |         |      |    |    |
| GO:CC | cytoplasmic vesicle lumen                       | GO:0060205 | 323   | 5.0E-07 | 6.30  | 114 | 14  |         |      |    |    |

|                                                |            |       |         |      |     |     |         |      |    |    |  |
|------------------------------------------------|------------|-------|---------|------|-----|-----|---------|------|----|----|--|
| GO:CC vesicle lumen                            | GO:0031983 | 325   | 5.4E-07 | 6.27 | 114 | 14  |         |      |    |    |  |
| GO:CC extracellular space                      | GO:0005615 | 3368  | 2.0E-06 | 5.70 | 114 | 43  | 2.3E-02 | 1.63 | 54 | 20 |  |
| GO:CC extracellular region                     | GO:0005576 | 4302  | 4.4E-06 | 5.36 | 114 | 49  | 8.5E-03 | 2.07 | 54 | 24 |  |
| GO:CC catalytic complex                        | GO:1902494 | 1707  | 1.3E-05 | 4.88 | 114 | 28  |         |      |    |    |  |
| GO:CC proteasome complex                       | GO:0000502 | 66    | 1.7E-05 | 4.77 | 114 | 7   |         |      |    |    |  |
| GO:CC ficolin-1-rich granule lumen             | GO:1904813 | 124   | 9.2E-05 | 4.04 | 114 | 8   |         |      |    |    |  |
| GO:CC endopeptidase complex                    | GO:1905369 | 88    | 1.3E-04 | 3.90 | 114 | 7   |         |      |    |    |  |
| GO:CC intracellular anatomical structure       | GO:0005622 | 17820 | 1.5E-04 | 3.82 | 114 | 111 |         |      |    |    |  |
| GO:CC contractile fiber                        | GO:0043292 | 247   | 2.2E-04 | 3.65 | 114 | 10  |         |      |    |    |  |
| GO:CC ribose phosphate diphosphokinase complex | GO:0002189 | 5     | 4.3E-04 | 3.37 | 114 | 3   |         |      |    |    |  |
| GO:CC peptidase complex                        | GO:1905368 | 122   | 1.1E-03 | 2.94 | 114 | 7   |         |      |    |    |  |
| GO:CC myofibril                                | GO:0030016 | 238   | 1.4E-03 | 2.84 | 114 | 9   |         |      |    |    |  |
| GO:CC ficolin-1-rich granule                   | GO:0101002 | 184   | 1.8E-03 | 2.75 | 114 | 8   |         |      |    |    |  |
| GO:CC secretory vesicle                        | GO:0099503 | 1043  | 2.5E-03 | 2.60 | 114 | 18  |         |      |    |    |  |
| GO:CC membrane-enclosed lumen                  | GO:0031974 | 6637  | 3.4E-03 | 2.47 | 114 | 57  |         |      |    |    |  |
| GO:CC organelle lumen                          | GO:0043233 | 6637  | 3.4E-03 | 2.47 | 114 | 57  |         |      |    |    |  |
| GO:CC intracellular organelle lumen            | GO:0070013 | 6637  | 3.4E-03 | 2.47 | 114 | 57  |         |      |    |    |  |
| GO:CC sarcomere                                | GO:0030017 | 217   | 6.0E-03 | 2.22 | 114 | 8   |         |      |    |    |  |
| GO:CC supramolecular fiber                     | GO:0099512 | 1017  | 6.9E-03 | 2.16 | 114 | 17  |         |      |    |    |  |
| GO:CC supramolecular polymer                   | GO:0099081 | 1026  | 7.8E-03 | 2.11 | 114 | 17  |         |      |    |    |  |
| GO:CC secretory granule                        | GO:0030141 | 870   | 1.6E-02 | 1.81 | 114 | 15  |         |      |    |    |  |
| GO:CC organelle                                | GO:0043226 | 16770 | 2.5E-02 | 1.60 | 114 | 104 |         |      |    |    |  |
| GO:CC cytoskeleton                             | GO:0005856 | 2381  | 2.6E-02 | 1.59 | 114 | 27  |         |      |    |    |  |
| GO:CC supramolecular complex                   | GO:0099080 | 1377  | 3.0E-02 | 1.52 | 114 | 19  |         |      |    |    |  |
| GO:CC azurophil granule lumen                  | GO:0035578 | 91    | 3.6E-02 | 1.44 | 114 | 5   |         |      |    |    |  |
| GO:CC I band                                   | GO:0031674 | 146   | 3.8E-02 | 1.43 | 114 | 6   |         |      |    |    |  |

|       |                                             |                    |       |         |      |     |     |         |      |    |    |
|-------|---------------------------------------------|--------------------|-------|---------|------|-----|-----|---------|------|----|----|
| GO:CC | mitochondrion                               | GO:0005739         | 1684  |         |      |     |     | 4.7E-02 | 1.32 | 54 | 13 |
| GO:CC | mitochondrial envelope                      | GO:0005740         | 807   |         |      |     |     | 3.8E-02 | 1.42 | 54 | 9  |
| GO:CC | mitochondrial outer membrane                | GO:0005741         | 211   |         |      |     |     | 4.4E-02 | 1.36 | 54 | 5  |
| GO:CC | membrane                                    | GO:0016020         | 9856  |         |      |     |     | 1.5E-02 | 1.83 | 54 | 39 |
| GO:CC | mitochondrial membrane                      | GO:0031966         | 756   |         |      |     |     | 2.3E-02 | 1.64 | 54 | 9  |
| GO:CC | phagocytic vesicle lumen                    | GO:0097013         | 5     |         |      |     |     | 1.5E-02 | 1.83 | 54 | 2  |
| GO:MF | protein binding                             | GO:0005515         | 14832 | 5.3E-06 | 5.28 | 117 | 110 |         |      |    |    |
| GO:MF | identical protein binding                   | GO:0042802         | 2121  | 4.5E-04 | 3.35 | 117 | 31  |         |      |    |    |
| GO:MF | ribose phosphate diphosphokinase activity   | GO:0004749         | 5     | 9.4E-04 | 3.03 | 117 | 3   |         |      |    |    |
| GO:MF | diphosphotransferase activity               | GO:0016778         | 6     | 1.9E-03 | 2.73 | 117 | 3   |         |      |    |    |
| GO:MF | protein homodimerization activity           | GO:0042803         | 701   | 6.6E-03 | 2.18 | 117 | 15  |         |      |    |    |
| GO:MF | UDP-glucosyltransferase activity            | GO:0035251         | 12    | 2.0E-02 | 1.70 | 117 | 3   |         |      |    |    |
| GO:MF | protein dimerization activity               | GO:0046983         | 1088  | 2.7E-02 | 1.57 | 117 | 18  |         |      |    |    |
| KEGG  | Proteasome                                  | KEGG:03050         | 46    | 2.1E-03 | 2.67 | 63  | 5   |         |      |    |    |
| KEGG  | Starch and sucrose metabolism               | KEGG:00500         | 36    | 1.3E-02 | 1.88 | 63  | 4   |         |      |    |    |
| KEGG  | Metabolic pathways                          | KEGG:01100         | 1535  | 2.5E-02 | 1.60 | 63  | 24  |         |      |    |    |
| KEGG  | Glycosaminoglycan degradation               | KEGG:00531         | 19    | 3.2E-02 | 1.49 | 63  | 3   |         |      |    |    |
| REAC  | Metabolism                                  | REAC:R-HSA-1430728 | 2075  | 2.2E-06 | 5.66 | 86  | 41  |         |      |    |    |
| REAC  | Metabolism of carbohydrates                 | REAC:R-HSA-71387   | 284   | 1.4E-03 | 2.87 | 86  | 12  |         |      |    |    |
| REAC  | AUF1 (hnRNP D0) binds and destabilizes mRNA | REAC:R-HSA-450408  | 54    | 2.0E-03 | 2.69 | 86  | 6   |         |      |    |    |

|      |                                                                     |                    |     |         |      |    |   |
|------|---------------------------------------------------------------------|--------------------|-----|---------|------|----|---|
| REAC | Hh mutants are degraded by ERAD                                     | REAC:R-HSA-5362768 | 56  | 2.5E-03 | 2.60 | 86 | 6 |
| REAC | Hh mutants abrogate ligand secretion                                | REAC:R-HSA-5387390 | 59  | 3.5E-03 | 2.46 | 86 | 6 |
| REAC | Defective CFTR causes cystic fibrosis                               | REAC:R-HSA-5678895 | 61  | 4.2E-03 | 2.38 | 86 | 6 |
| REAC | Hedgehog ligand biogenesis                                          | REAC:R-HSA-5358346 | 65  | 6.1E-03 | 2.22 | 86 | 6 |
| REAC | ABC-family proteins mediated transport                              | REAC:R-HSA-382556  | 103 | 8.7E-03 | 2.06 | 86 | 7 |
| REAC | ABC transporter disorders                                           | REAC:R-HSA-5619084 | 78  | 1.7E-02 | 1.76 | 86 | 6 |
| REAC | Cross-presentation of soluble exogenous antigens (endosomes)        | REAC:R-HSA-1236978 | 49  | 2.0E-02 | 1.70 | 86 | 5 |
| REAC | Regulation of activated PAK-2p34 by proteasome mediated degradation | REAC:R-HSA-211733  | 50  | 2.2E-02 | 1.65 | 86 | 5 |
| REAC | Regulation of ornithine decarboxylase (ODC)                         | REAC:R-HSA-350562  | 51  | 2.4E-02 | 1.61 | 86 | 5 |
| REAC | Degradation of beta-catenin by the destruction complex              | REAC:R-HSA-195253  | 83  | 2.5E-02 | 1.61 | 86 | 6 |

|      |                                                         |                    |    |         |      |    |   |
|------|---------------------------------------------------------|--------------------|----|---------|------|----|---|
| REAC | Vpu mediated degradation of CD4                         | REAC:R-HSA-180534  | 52 | 2.7E-02 | 1.57 | 86 | 5 |
| REAC | Autodegradation of the E3 ubiquitin ligase COP1         | REAC:R-HSA-349425  | 52 | 2.7E-02 | 1.57 | 86 | 5 |
| REAC | Ubiquitin Mediated Degradation of Phosphorylated Cdc25A | REAC:R-HSA-69601   | 52 | 2.7E-02 | 1.57 | 86 | 5 |
| REAC | p53-Independent DNA Damage Response                     | REAC:R-HSA-69610   | 52 | 2.7E-02 | 1.57 | 86 | 5 |
| REAC | p53-Independent G1/S DNA damage checkpoint              | REAC:R-HSA-69613   | 52 | 2.7E-02 | 1.57 | 86 | 5 |
| REAC | Ubiquitin-dependent degradation of Cyclin D             | REAC:R-HSA-75815   | 52 | 2.7E-02 | 1.57 | 86 | 5 |
| REAC | Glycogen metabolism                                     | REAC:R-HSA-8982491 | 27 | 2.7E-02 | 1.57 | 86 | 4 |
| REAC | Glycogen storage disease type XV (GYG1)                 | REAC:R-HSA-3814836 | 2  | 2.8E-02 | 1.55 | 86 | 2 |
| REAC | Glycogen storage disease type 0 (muscle GYS1)           | REAC:R-HSA-3828062 | 2  | 2.8E-02 | 1.55 | 86 | 2 |
| REAC | Regulation of Apoptosis                                 | REAC:R-HSA-169911  | 53 | 3.0E-02 | 1.53 | 86 | 5 |
| REAC | Vif-mediated degradation of APOBEC3G                    | REAC:R-HSA-180585  | 53 | 3.0E-02 | 1.53 | 86 | 5 |
| REAC | Negative regulation of NOTCH4 signaling                 | REAC:R-HSA-9604323 | 53 | 3.0E-02 | 1.53 | 86 | 5 |



|      |                                                                      |                    |     |         |      |    |   |
|------|----------------------------------------------------------------------|--------------------|-----|---------|------|----|---|
| REAC | Regulation of mRNA stability by proteins that bind AU-rich elements  | REAC:R-HSA-450531  | 86  | 3.0E-02 | 1.52 | 86 | 6 |
| REAC | Host Interactions of HIV factors                                     | REAC:R-HSA-162909  | 125 | 3.0E-02 | 1.52 | 86 | 7 |
| REAC | Regulation of RUNX3 expression and activity                          | REAC:R-HSA-8941858 | 54  | 3.2E-02 | 1.49 | 86 | 5 |
| REAC | SCF-beta-TrCP mediated degradation of Emi1                           | REAC:R-HSA-174113  | 55  | 3.5E-02 | 1.45 | 86 | 5 |
| REAC | Degradation of AXIN                                                  | REAC:R-HSA-4641257 | 55  | 3.5E-02 | 1.45 | 86 | 5 |
| REAC | FBXL7 down-regulates AURKA during mitotic entry and in early mitosis | REAC:R-HSA-8854050 | 55  | 3.5E-02 | 1.45 | 86 | 5 |
| REAC | MAPK6/MAPK4 signaling                                                | REAC:R-HSA-5687128 | 89  | 3.7E-02 | 1.44 | 86 | 6 |
| REAC | Degradation of DVL                                                   | REAC:R-HSA-4641258 | 57  | 4.2E-02 | 1.38 | 86 | 5 |
| REAC | Stabilization of p53                                                 | REAC:R-HSA-69541   | 57  | 4.2E-02 | 1.38 | 86 | 5 |
| REAC | Metabolism of polyamines                                             | REAC:R-HSA-351202  | 58  | 4.6E-02 | 1.34 | 86 | 5 |

|      |                                    |                            |    |         |      |    |   |  |
|------|------------------------------------|----------------------------|----|---------|------|----|---|--|
| REAC | NIK-->noncanonical NF-kB signaling | REAC:R-<br>HSA-<br>5676590 | 59 | 5.0E-02 | 1.30 | 86 | 5 |  |
|------|------------------------------------|----------------------------|----|---------|------|----|---|--|
